# Supplementary figures and images for: Analysis of Complete Chloroplast Genome: Structure, Phylogenetic Relationships of Galega orientalis and Evolutionary Inference of Galegeae
Source: MDPI journal article supplement (doi:10.3390/genes14010176), 2023-01-09

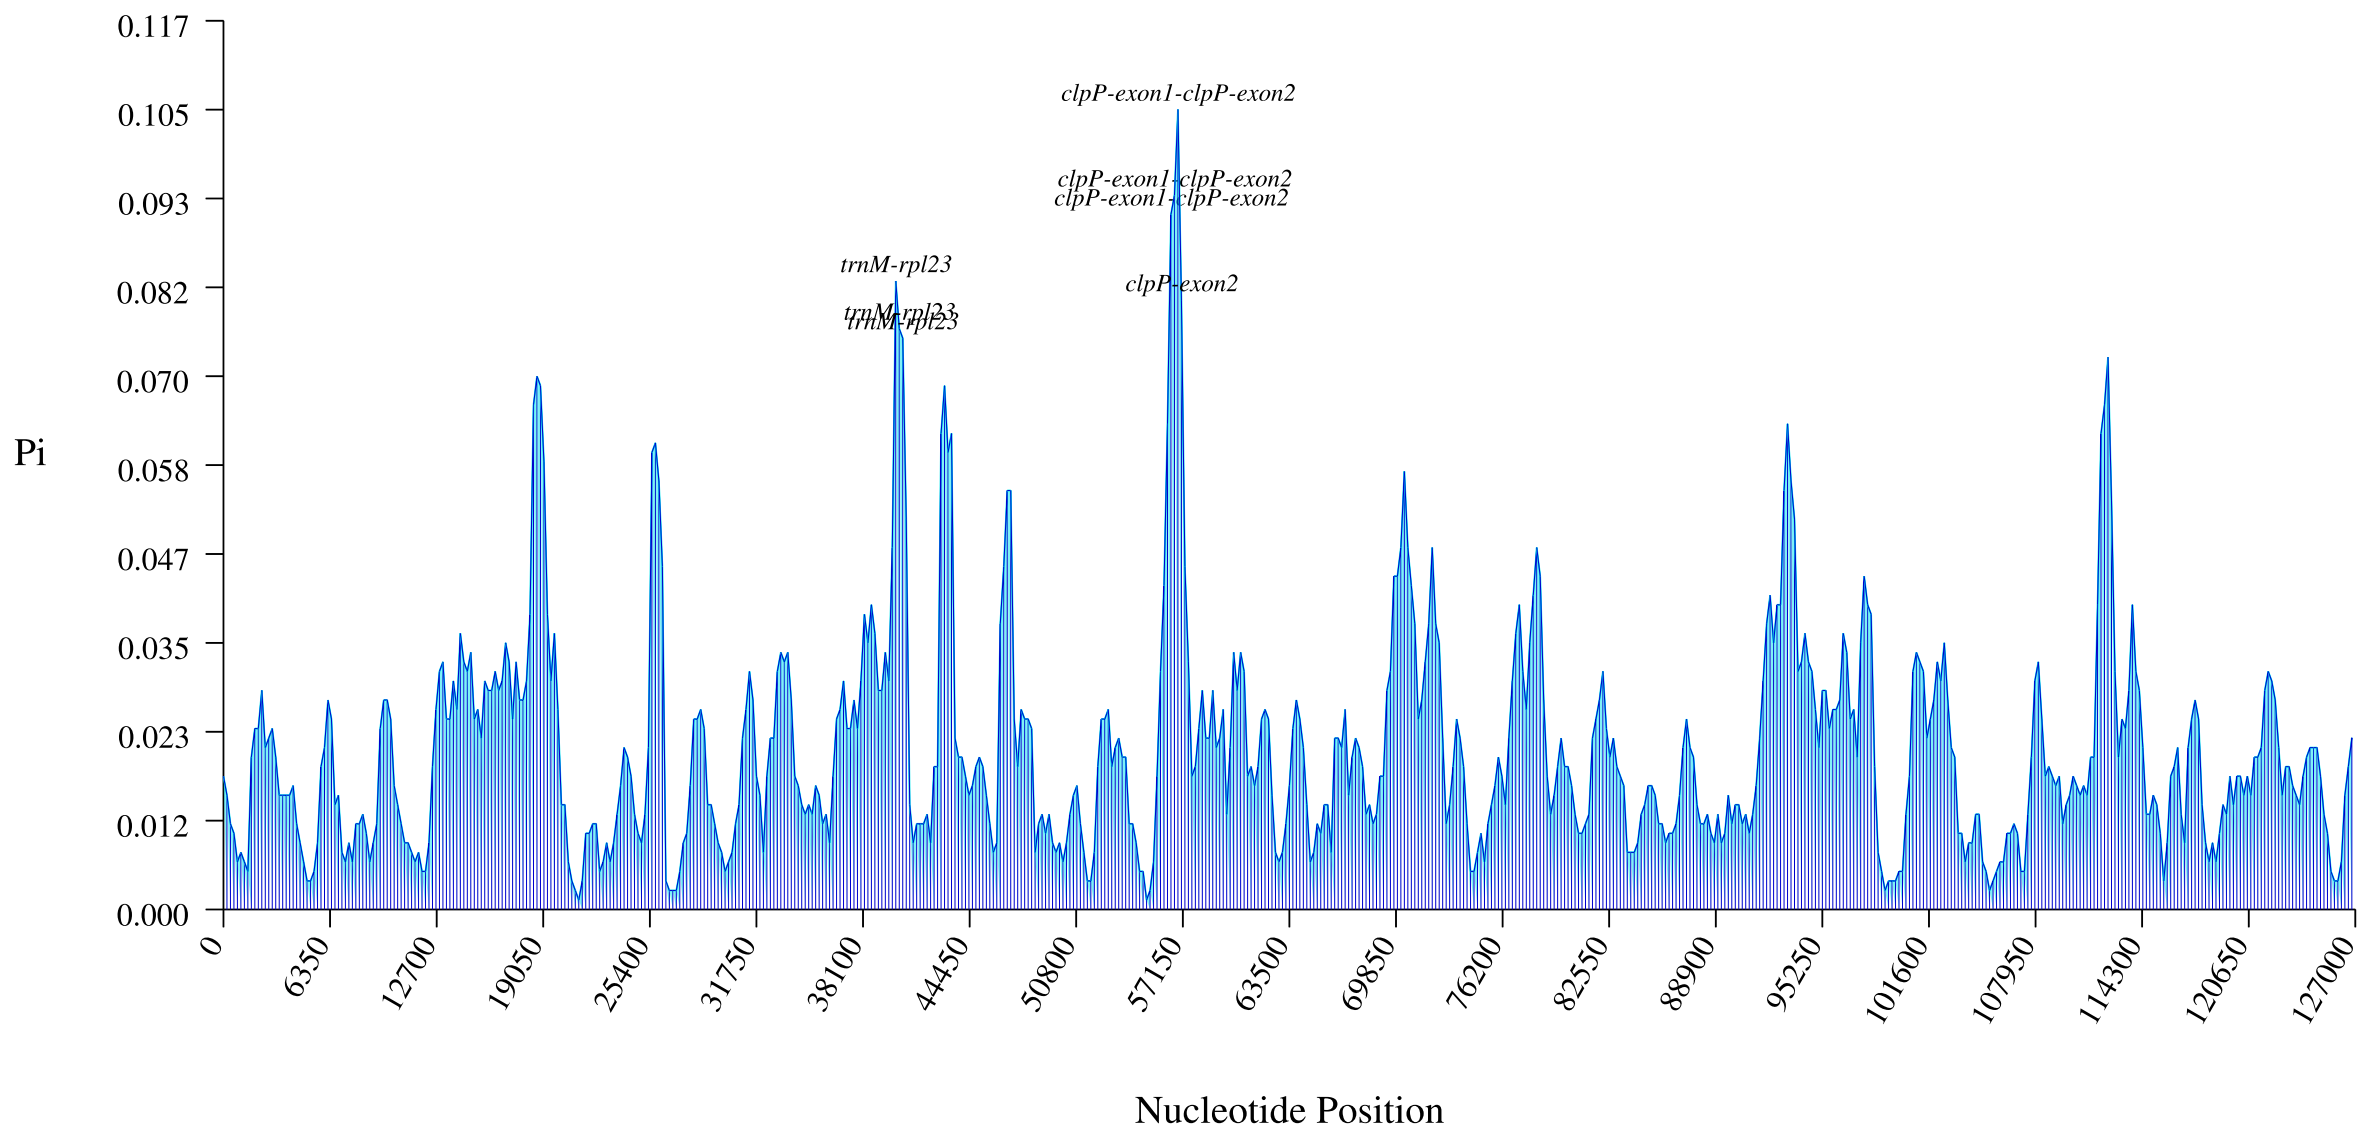

Supplement: s1 [file s1]

# Galega\_orientalis

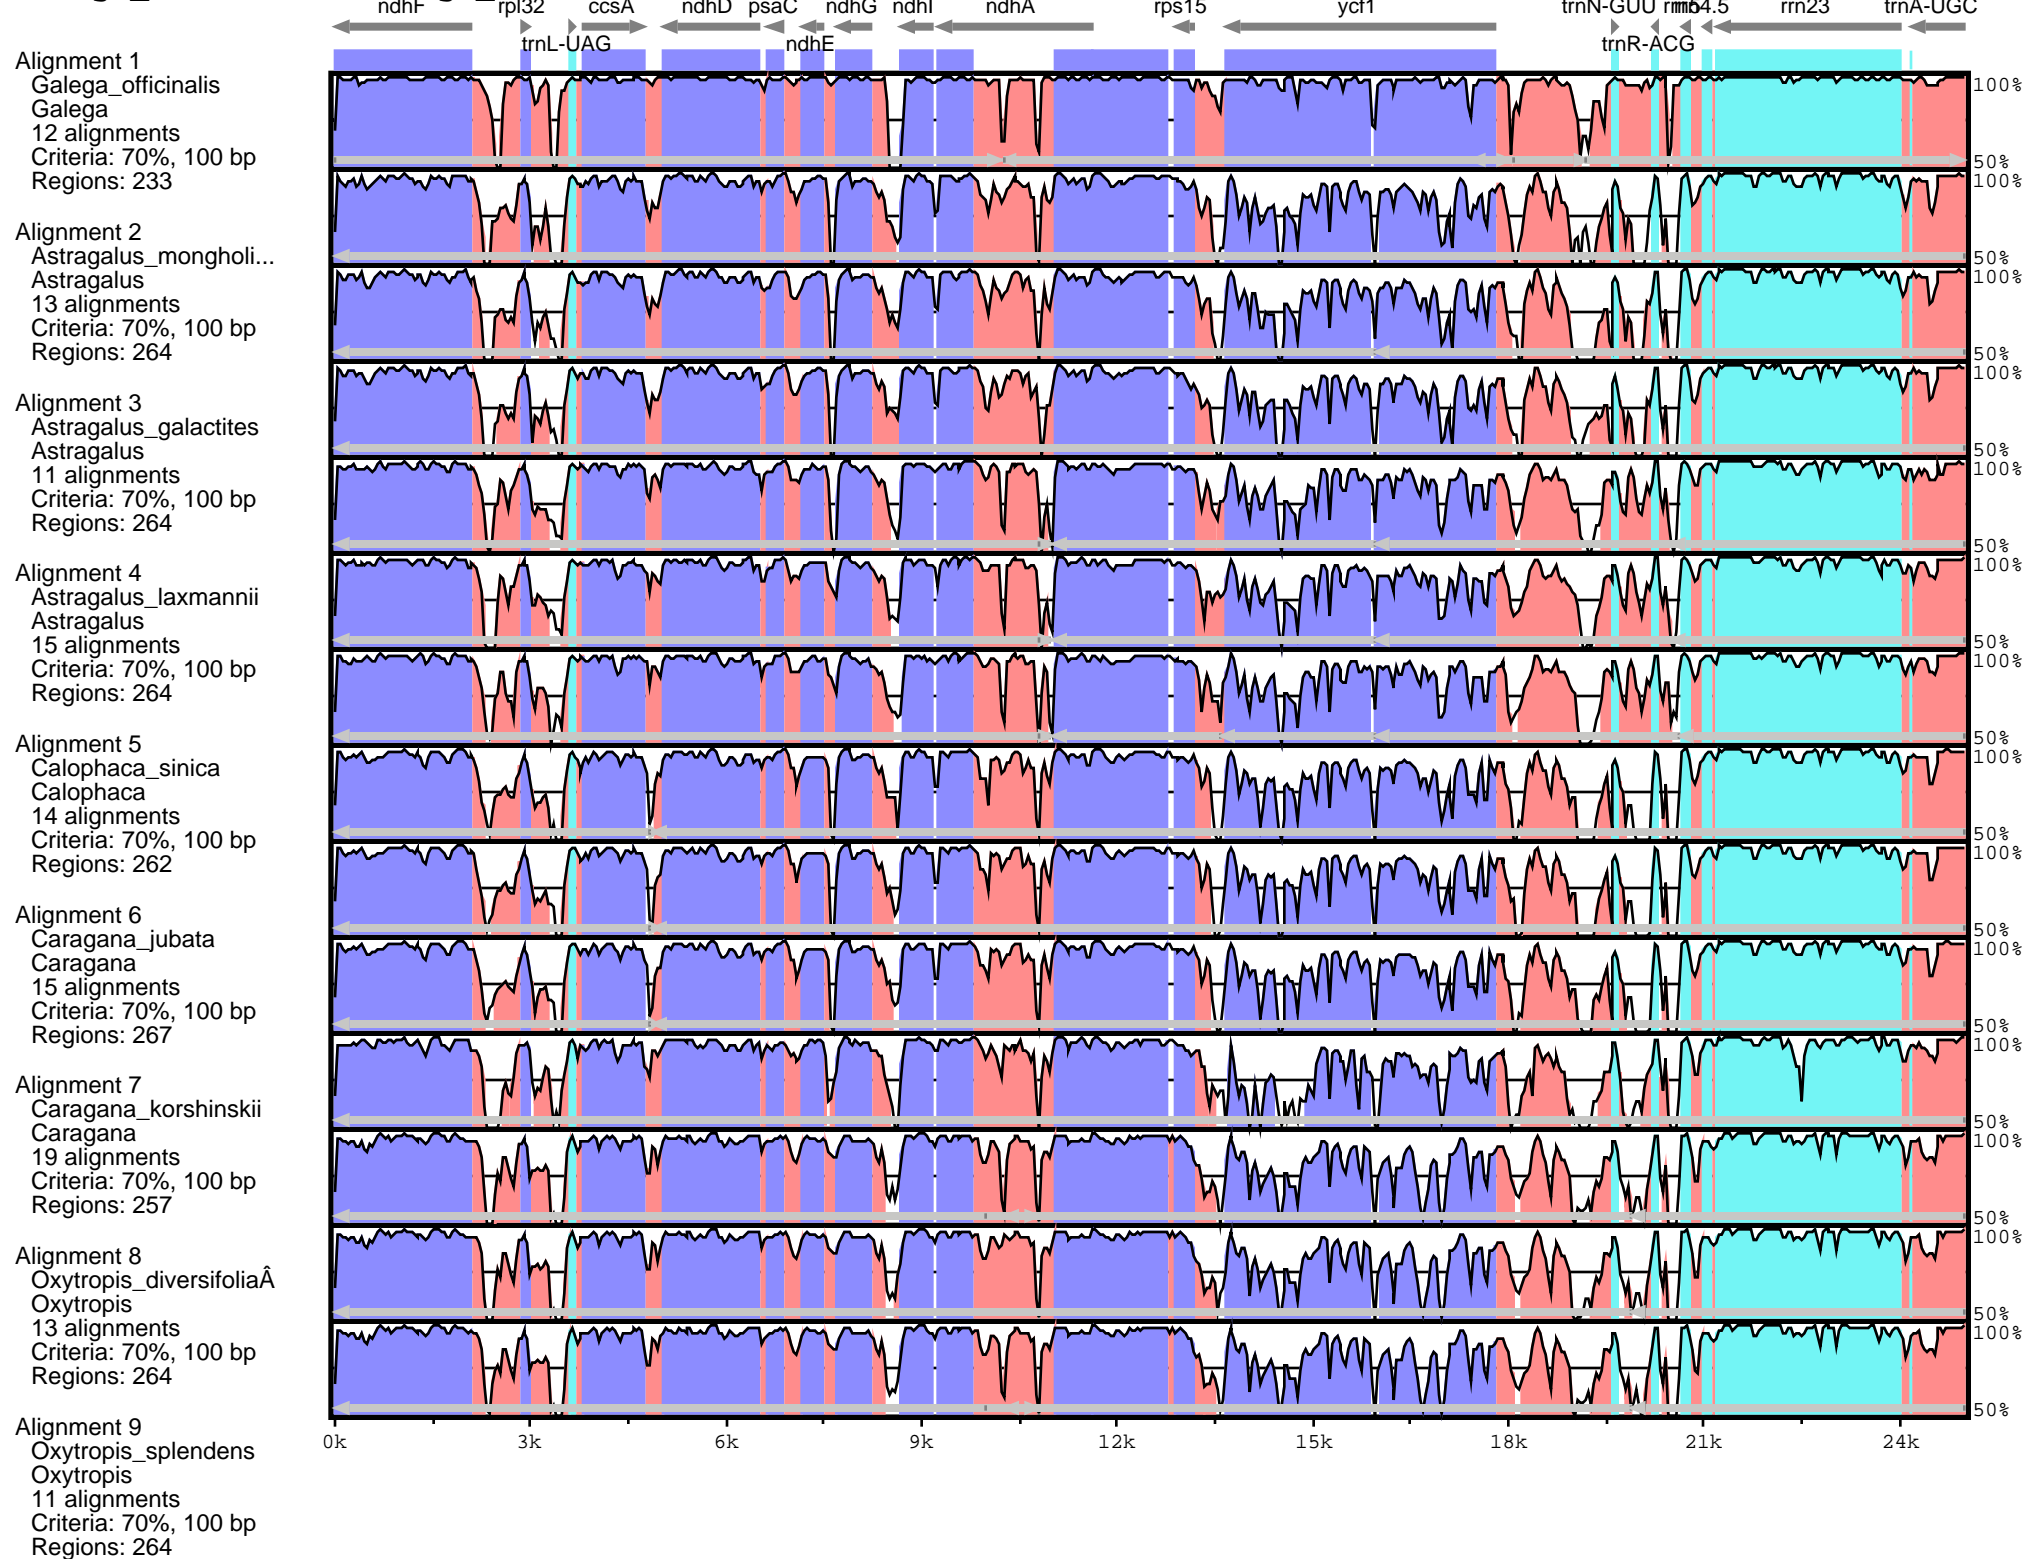

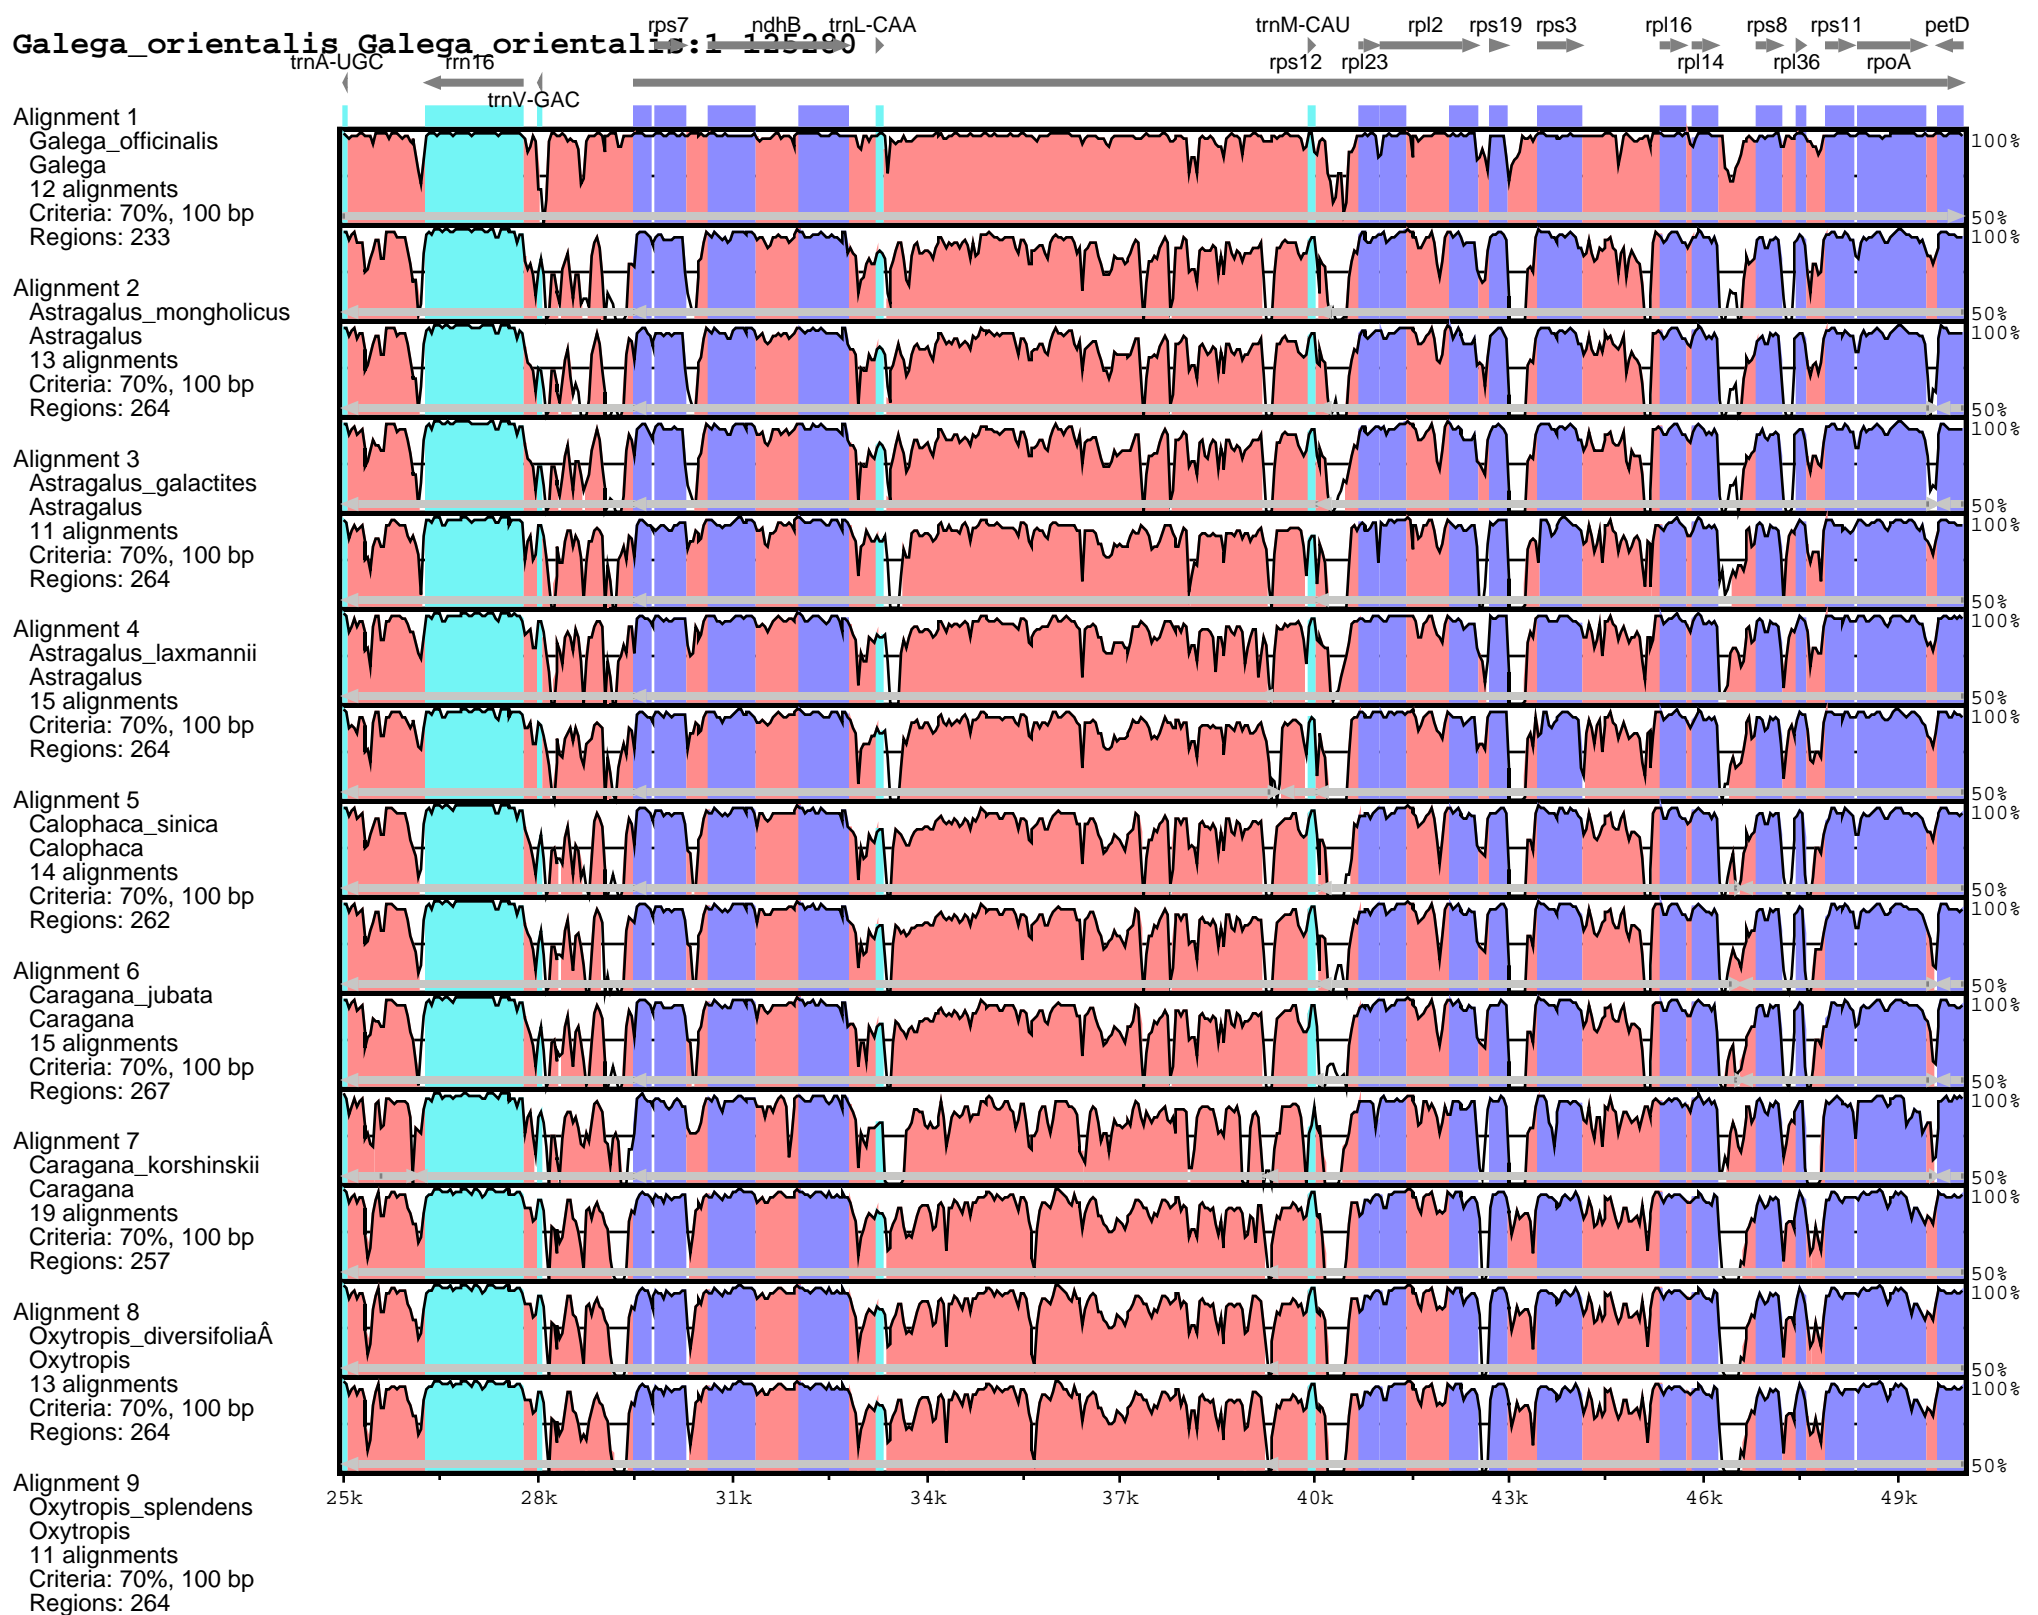

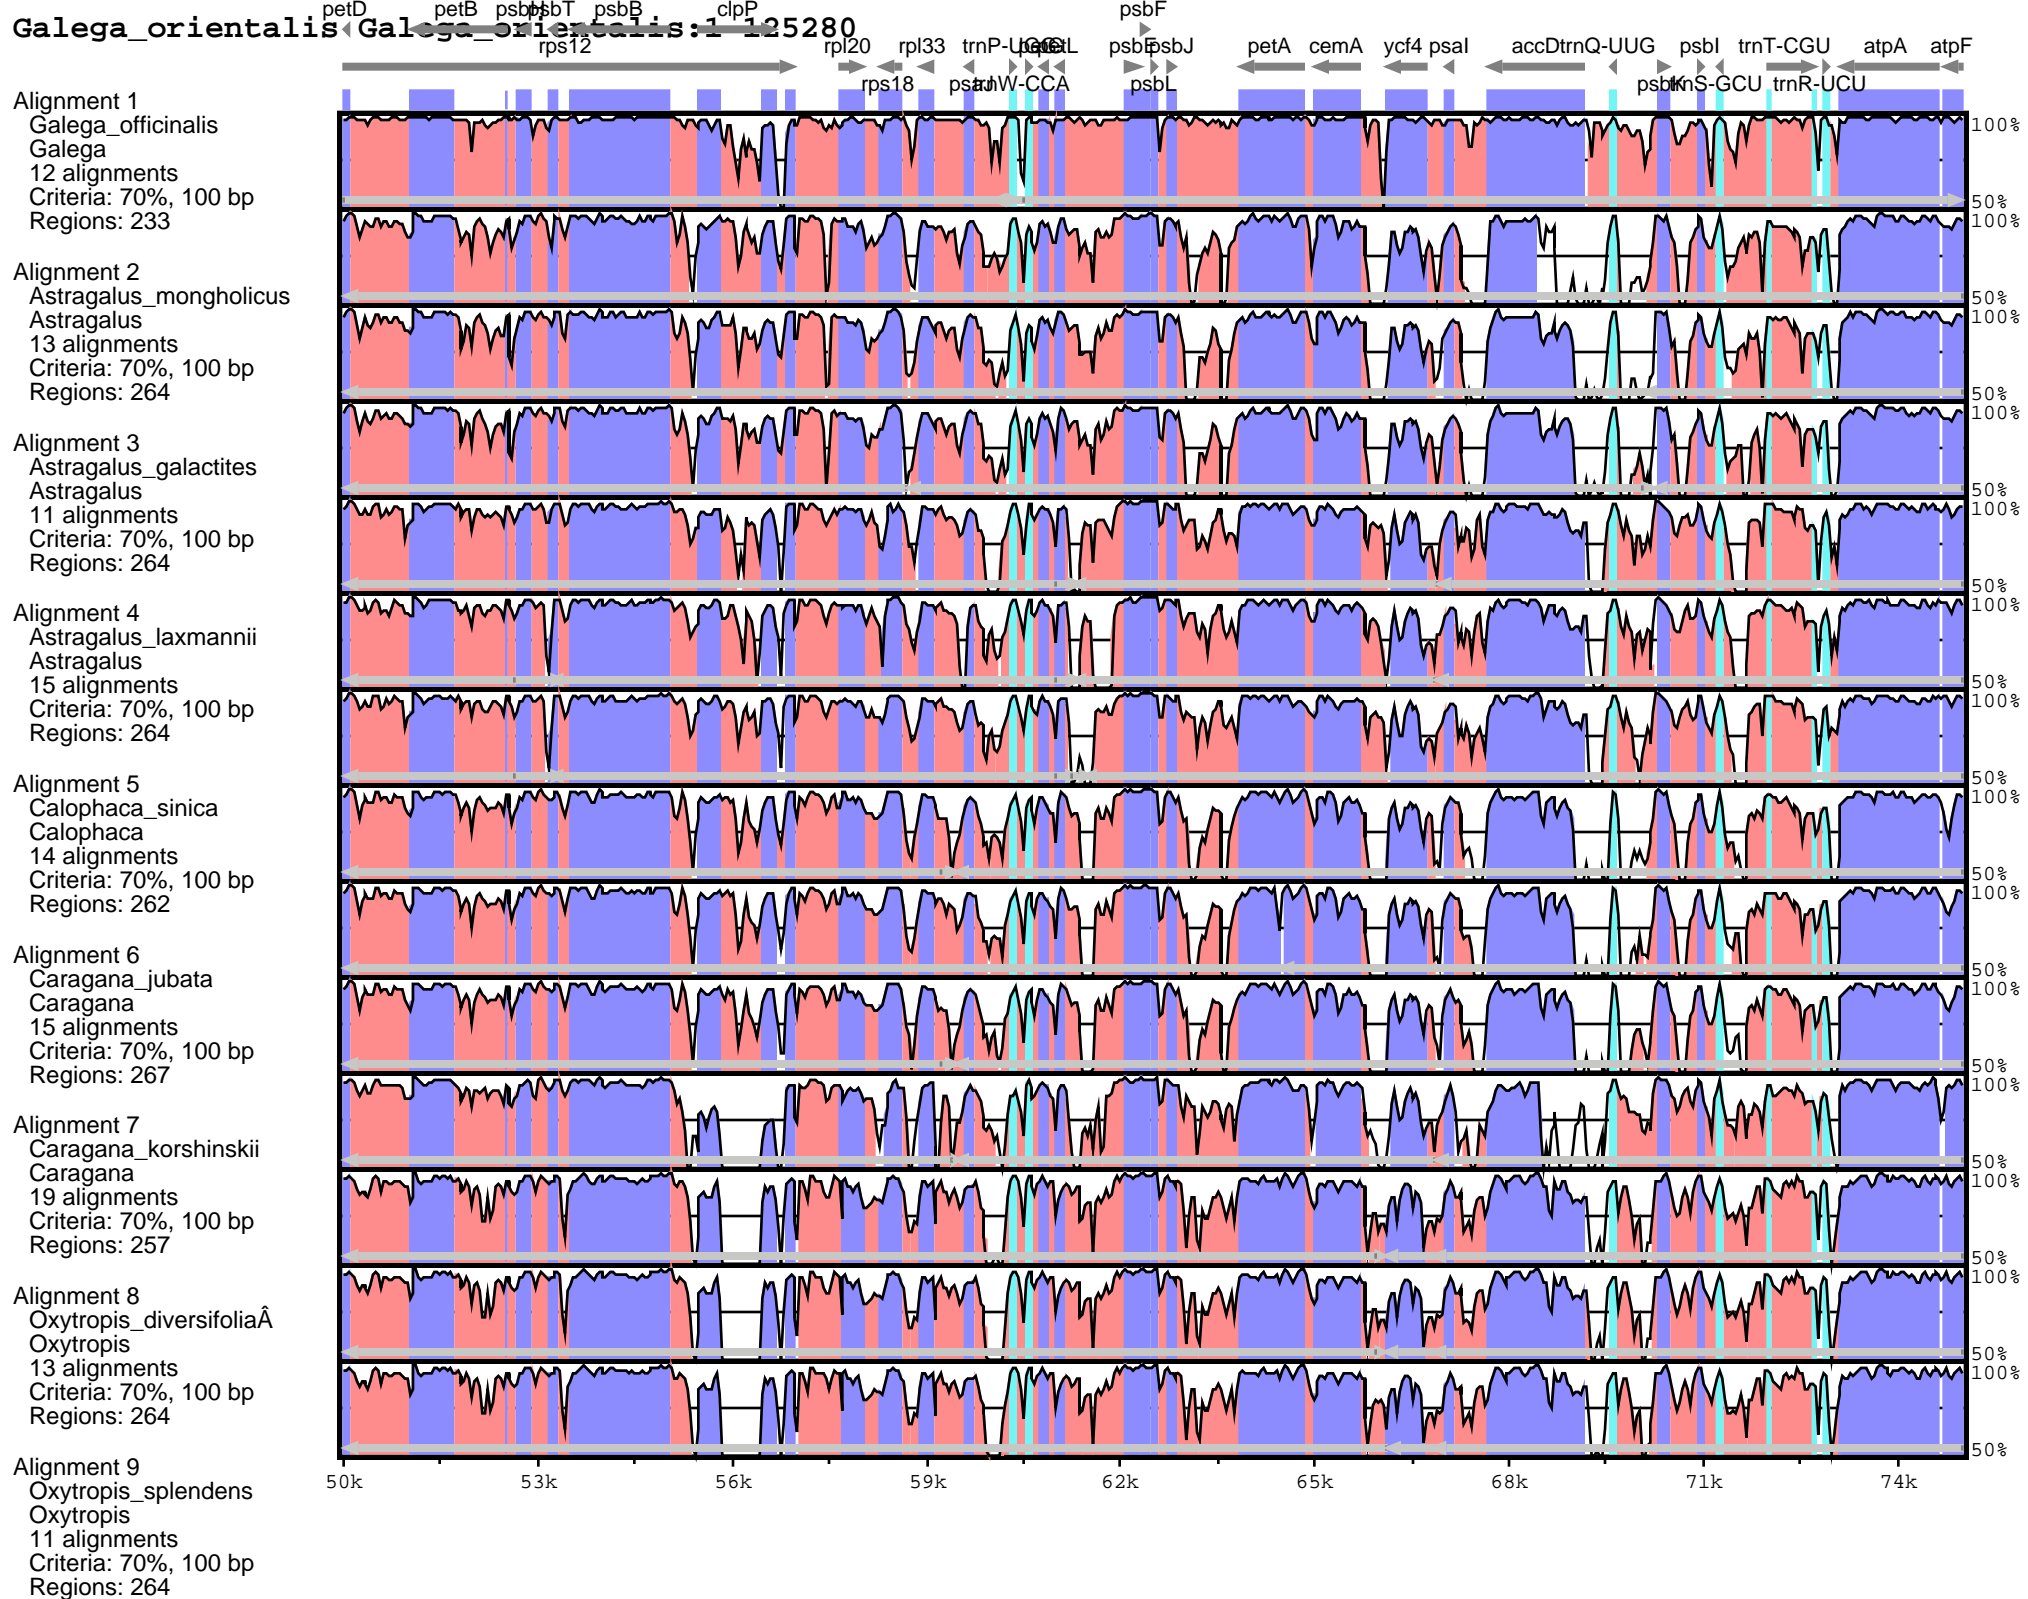

# Galega\_orientalis

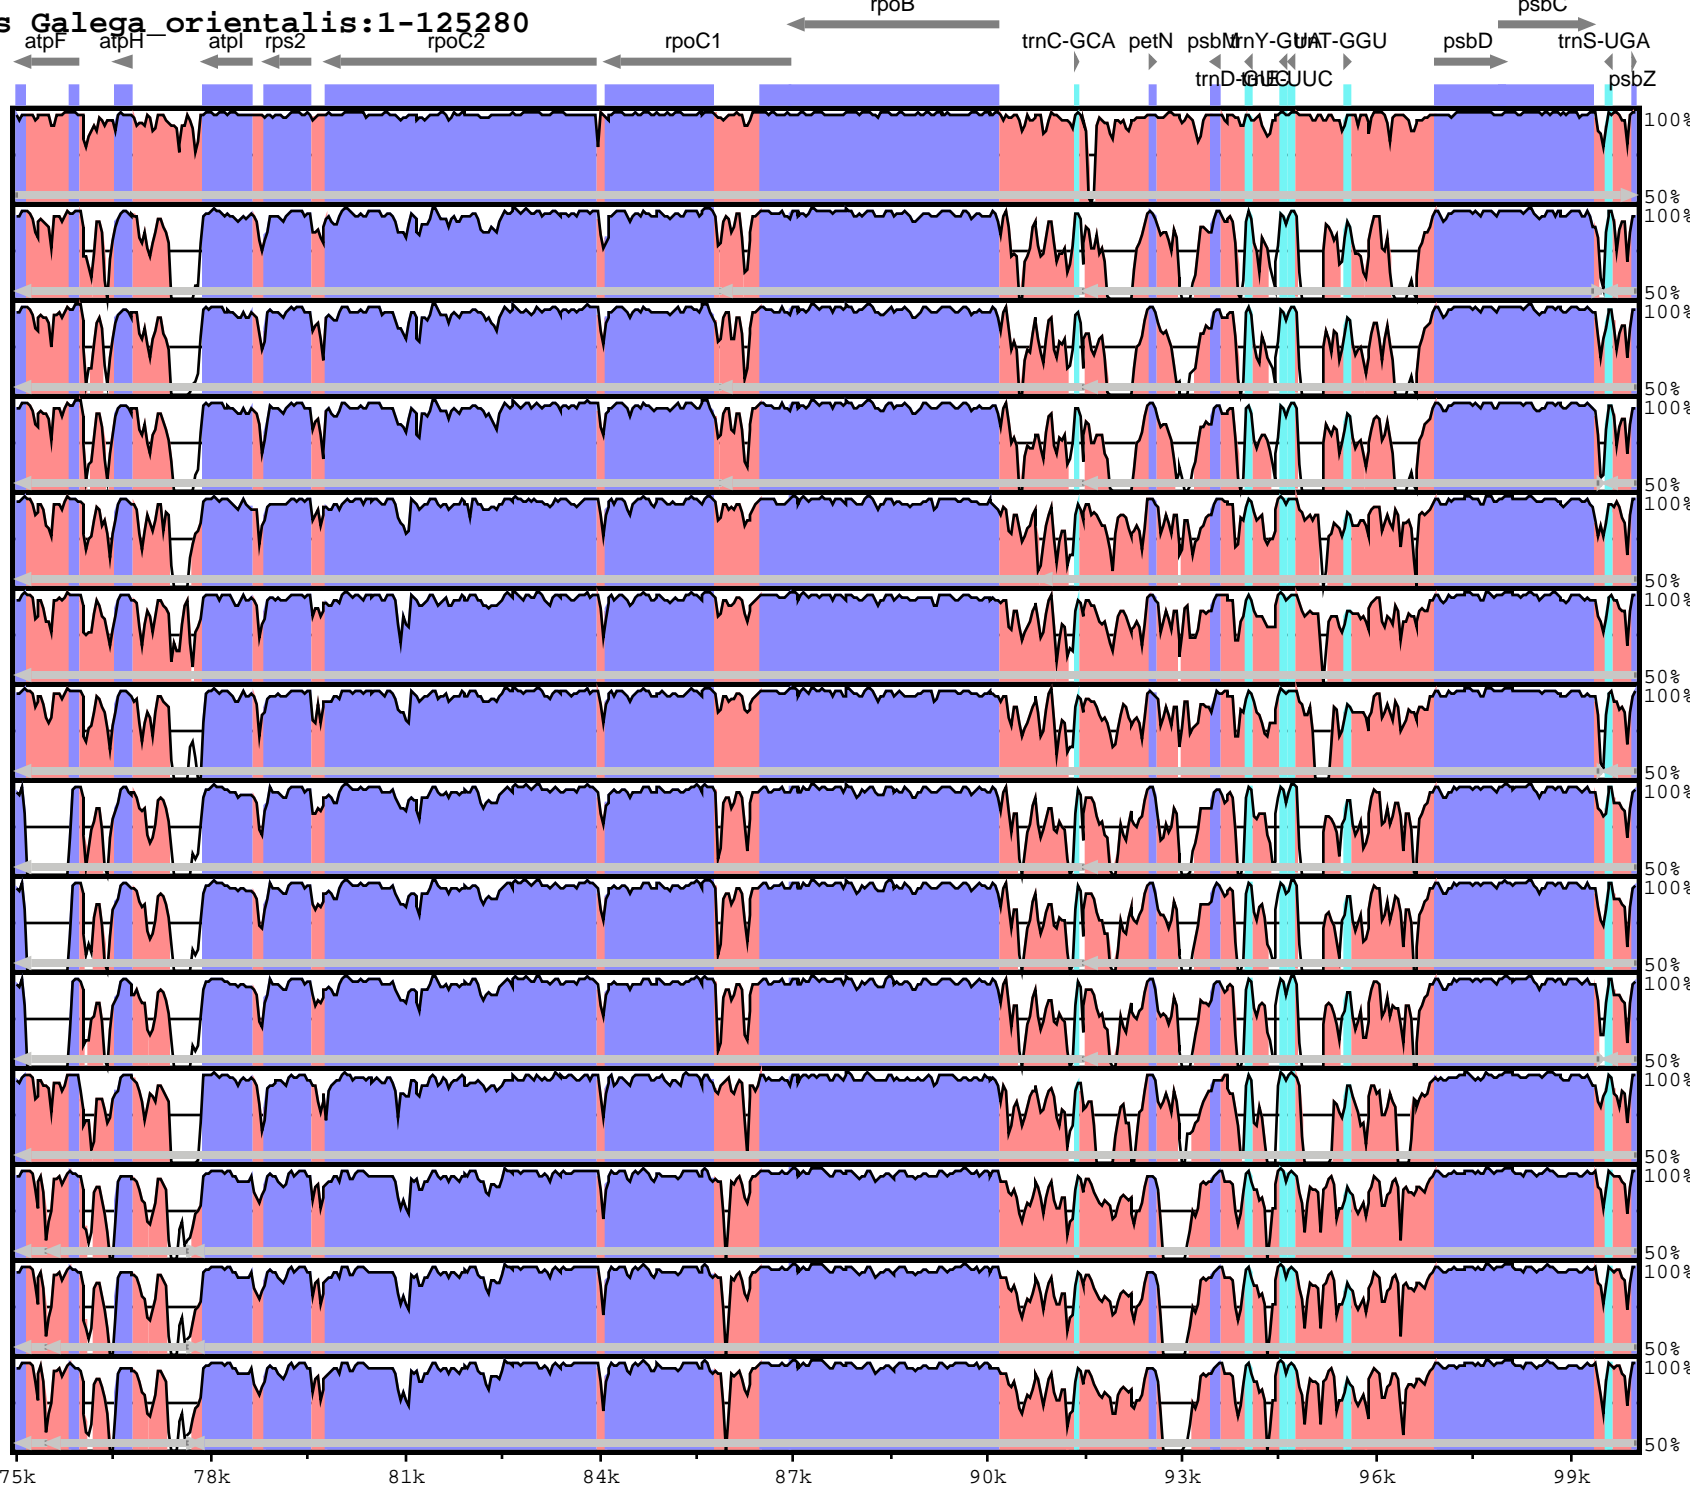

Supplement: s1 [file s1]
